# Supplementary material
Source: PubMed Central journal article supplement (PMC5937173)
Supplement: 77FileS1.pdf [file 77FileS1.pdf]

## File S1: Tables S1–S2, Figures S1–S3, and Supporting Methods

### Genetic variance partitioning and genome-wide prediction with allele dosage information in autotetraploid potato

Endelman *et al.*

**Table S1** Number of new vs. returning clones by year in the training population.

| Year | No. new clones | No. returning clones |
|------|----------------|----------------------|
| 2012 | 78             | 0                    |
| 2013 | 59             | 45                   |
| 2014 | 82             | 58                   |
| 2015 | 43             | 56                   |
| 2016 | 128            | 52                   |
| 2017 | 181            | 67                   |

**Table S2** Genetic variance estimates (and SE) for the G+GG+D model, as a proportion of total genetic variance.

|          | Yield       | Specific Gravity        | Fry Color   |
|----------|-------------|-------------------------|-------------|
| $V_a$    | 0.45 (0.13) | 0.20 (0.10)             | 0.45 (0.17) |
| $V_{aa}$ | 0.03 (0.24) | 0.51 (0.22)             | 0.44 (0.23) |
| $V_d$    | 0.07 (0.10) | 0.00 (NA <sup>a</sup> ) | 0.00 (NA)   |
| $V_r$    | 0.45 (0.20) | 0.29 (0.18)             | 0.12 (0.17) |

<sup>a</sup> REML solution on the boundary

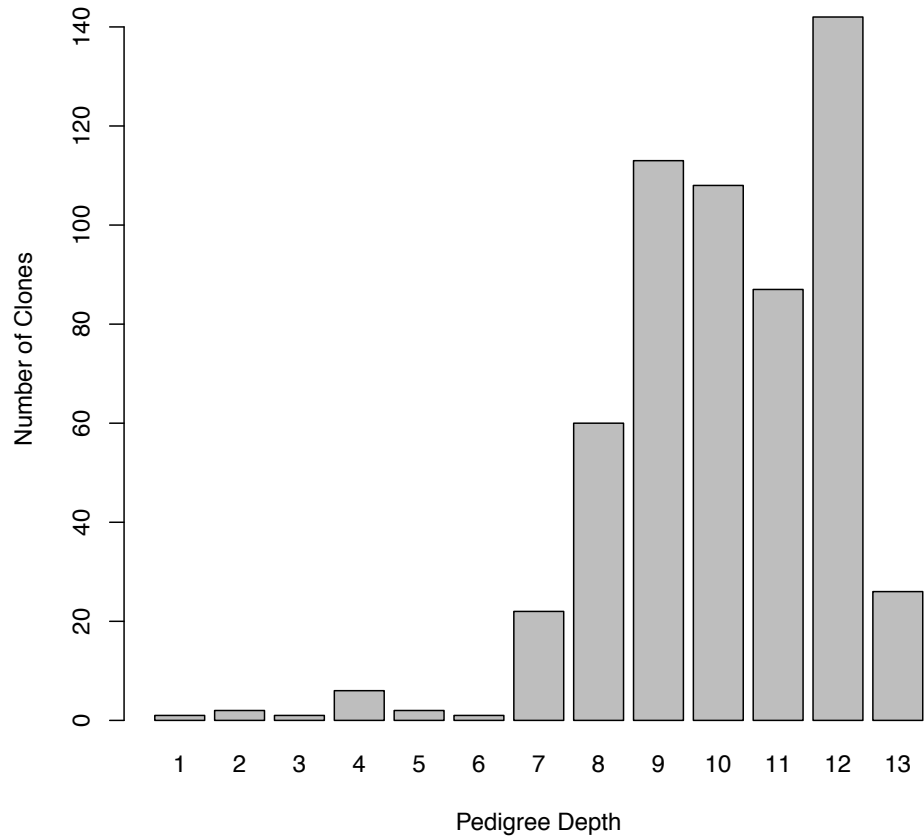

**Figure S1** Distribution of pedigree depth for the training population of 571 clones. Pedigree depth is the maximum number of generations to a founder.

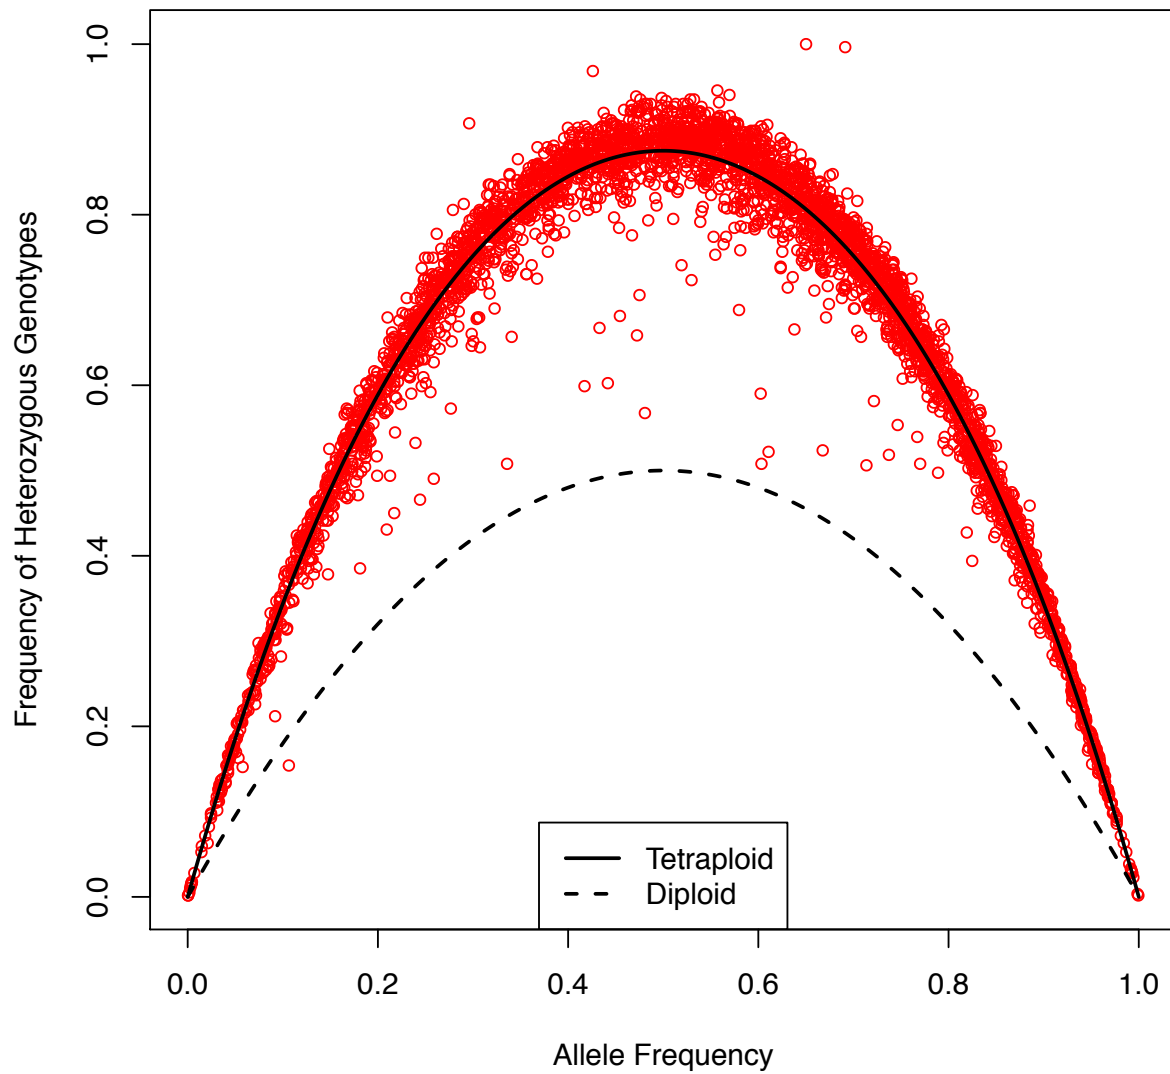

**Figure S2** Comparison of the observed (red circle) vs. expected (black line) frequency of heterozygotes under random mating, for the 3895 SNPs used in this study. For allele frequency  $p$  ( $q = 1-p$ ), the heterozygote frequency at panmictic equilibrium is  $4p^3q + 6p^2q^2 + 4pq^3$  for tetraploids compared with  $2pq$  for diploids (Gallais 2003).

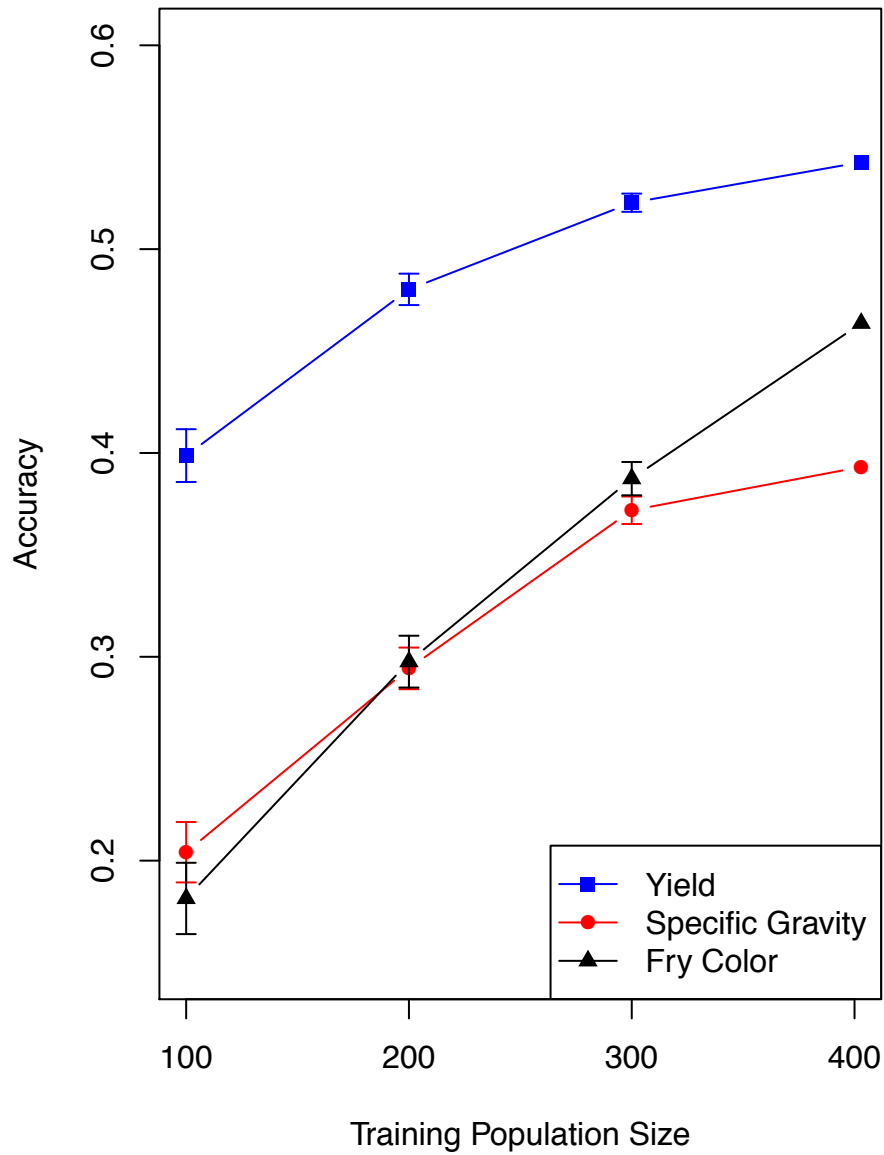

**Figure S3** Effect of population size (N) on prediction accuracy within the training set. The points at N = 403 correspond to using all clones with pedigree depth < 12 to predict clones with pedigree depth  $\geq 12$ , using the G+GG+D model. The points at N = 100, 200, 300 are the mean accuracy for 200 random subsets, and the error bars show  $\pm 1$  standard error.

## Supporting Methods

### Normal Equations for the Additive Effects

Taking the derivative of Eq. 2 with respect to an arbitrary allele  $t$ , and setting the result equal to zero:

$$\begin{aligned}
 0 = & -2 \sum_{jkl} p_t p_j p_k p_l [z_{tjkl} - (\alpha_t + \alpha_j + \alpha_k + \alpha_l)] \\
 & - 2 \sum_{ikl} p_i p_t p_k p_l [z_{itkl} - (\alpha_i + \alpha_t + \alpha_k + \alpha_l)] \\
 & - 2 \sum_{ijl} p_i p_j p_t p_l [z_{ijtl} - (\alpha_i + \alpha_j + \alpha_t + \alpha_l)] \\
 & - 2 \sum_{ijk} p_i p_j p_k p_t [z_{ijkt} - (\alpha_i + \alpha_j + \alpha_k + \alpha_t)]
 \end{aligned} \tag{S1}$$

Because genotypic value is unchanged upon permutation of the indices, each of the terms in Eq. S1 is identical, which leads to the result:

$$0 = \sum_{jkl} p_j p_k p_l [z_{tjkl} - (\alpha_t + \alpha_j + \alpha_k + \alpha_l)] \tag{S2}$$

Rearranging Eq. S2, and using the identity  $\sum_j p_j = 1$ , leads to

$$\sum_{jkl} p_j p_k p_l z_{tjkl} = \alpha_t + 3 \sum_j p_j \alpha_j \tag{S3}$$

Multiplying Eq. S3 by  $p_t$ , summing over  $t$ , and using the interchangeability of the indices, generates

$$\sum_{tjkl} p_t p_j p_k p_l z_{tjkl} = 4 \sum_j p_j \alpha_j \tag{S4}$$

From the definition of  $z$  (Eq. 1), the left side of Eq. S4 is zero, so the right side is also zero, which completes the proof of Eq. 3.

### Normal Equations for the Digenic Dominance Effects

Taking the derivative of Eq. 5 with respect to an arbitrary allele pair  $(s,t)$ , setting the result equal to zero, and using the interchangeability of the indices, generates

$$0 = \sum_{kl} p_k p_l [y_{stkl} - (\beta_{st} + \beta_{sk} + \beta_{sl} + \beta_{tk} + \beta_{tl} + \beta_{kl})] \quad (\text{S5})$$

Upon rearranging and using the interchangeability of indices, Eq. S5 becomes

$$\sum_{kl} p_k p_l y_{stkl} = \beta_{st} + 2 \sum_k \beta_{sk} p_k + 2 \sum_k \beta_{tk} p_k + \sum_{kl} \beta_{kl} p_k p_l \quad (\text{S6})$$

The left side of this equation equals  $\bar{g}_{st..} - \mu - \alpha_s - \alpha_t$ . Multiplying by  $p_t$  and summing over  $t$  (at fixed  $s$ ), the left side becomes zero, and the right side becomes

$$0 = 3 \sum_k \beta_{sk} p_k + 3 \sum_{kl} \beta_{kl} p_k p_l \quad (\text{S7})$$

Multiplying Eq. S7 by  $p_s$  and summing over  $s$  leads to

$$0 = 6 \sum_k \beta_{sk} p_s p_k \quad (\text{S8})$$

Eq. S8 shows that the second term in Eq. S7 is zero, which implies the first term is also zero, which completes the proof of Eq. 6.

### Derivation of Eq. 12

For a bi-allelic locus, the constraint Eq. 6 is a system of two equations with three digenic dominance parameters:

$$\begin{aligned} p\beta_{BB} + q\beta_{Bb} &= 0 \\ p\beta_{Bb} + q\beta_{bb} &= 0 \end{aligned} \tag{S9}$$

To uniquely determine the solution, we introduce the parameter  $\beta \equiv \beta_{BB} - 2\beta_{Bb} + \beta_{bb}$ , which in combination with Eq. S9 produces the linear system:

$$\begin{bmatrix} 1 & -2 & 1 \\ p & q & 0 \\ 0 & p & q \end{bmatrix} \begin{bmatrix} \beta_{BB} \\ \beta_{Bb} \\ \beta_{bb} \end{bmatrix} = \begin{bmatrix} \beta \\ 0 \\ 0 \end{bmatrix} \tag{S10}$$

Using Gaussian elimination, Eq. S10 can be reduced to

$$\begin{bmatrix} 1 & -2 & 1 \\ 0 & q + 2p & -p \\ 0 & 1 & 0 \end{bmatrix} \begin{bmatrix} \beta_{BB} \\ \beta_{Bb} \\ \beta_{bb} \end{bmatrix} = \begin{bmatrix} \beta \\ -p\beta \\ -pq\beta \end{bmatrix} \tag{S11}$$

and back-substitution produces Eq. 12.

### Derivation of Eq. 13

Using Eq. 12, the total digenic dominance  $v_X$  for a clone with dosage  $X$  of the  $B$  allele is

$$\begin{aligned} v_4 &= 6\beta_{BB} = 6q^2\beta \\ v_3 &= 3\beta_{BB} + 3\beta_{Bb} = (3q^2 - 3pq)\beta \\ v_2 &= 1\beta_{BB} + 4\beta_{Bb} + 1\beta_{bb} = (q^2 - 4pq + p^2)\beta \\ v_1 &= 3\beta_{Bb} + 3\beta_{bb} = (-3pq + 3p^2)\beta \\ v_0 &= 6\beta_{bb} = 6p^2\beta \end{aligned} \tag{S12}$$

Replacing all instances of  $q$  with  $1-p$ , Eq. S12 becomes

$$\begin{aligned} v_4 &= (6p^2 - 12p + 6)\beta \\ v_3 &= (6p^2 - 9p + 3)\beta \\ v_2 &= (6p^2 - 6p + 1)\beta \\ v_1 &= (6p^2 - 3p)\beta \\ v_0 &= 6p^2\beta \end{aligned} \tag{S13}$$

which is equivalent to Eq. 13.
